# Supplementary material
Source: publisher site journal article supplement (https://www.spandidos-publications.com/5403/downloadSupplementary)
Supplement: Supplementary file 1 [file downloadSupplementary]

Figure S1. 5-year (A) disease-free survival and (B) overall survival of patients accepting capecitabine alone or combined chemotherapy. N.S., no significance.

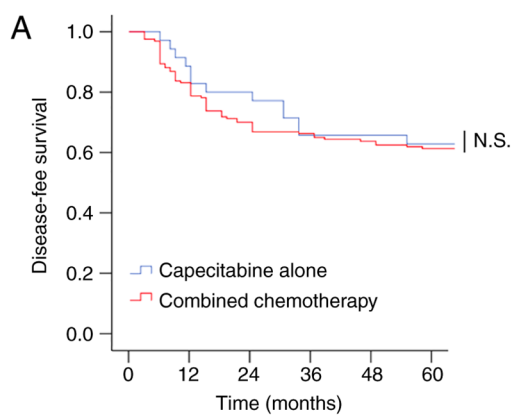

| No. at risk           | 0   | 12  | 24  | 36  | 48  | 60 |
|-----------------------|-----|-----|-----|-----|-----|----|
| Capecitabine alone    | 35  | 29  | 27  | 23  | 23  | 22 |
| Combined chemotherapy | 160 | 126 | 107 | 104 | 100 | 98 |

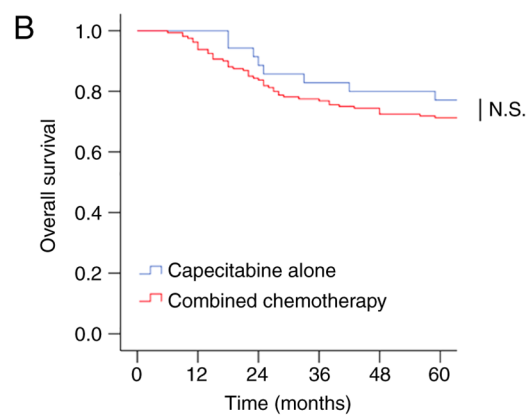

| No. at risk           | 0   | 12  | 24  | 36  | 48  | 60  |
|-----------------------|-----|-----|-----|-----|-----|-----|
| Capecitabine alone    | 35  | 35  | 31  | 29  | 28  | 27  |
| Combined chemotherapy | 160 | 150 | 134 | 123 | 116 | 114 |
